1 **Natural tolerance to transposition is associated with**  
2 **Myc-regulation and DNA repair**

3

4 **Jyoti Lama<sup>1</sup>, Satyam Srivastav<sup>1</sup>, Sadia Tasnim<sup>1</sup>, Donald Hubbard<sup>1</sup> & Erin S. Kelleher<sup>1\*</sup>**

5 **<sup>1</sup> Department of Biology and Biochemistry, University of Houston**

6 **\* To whom correspondence should be addressed: [eskelleher@uh.edu](mailto:eskelleher@uh.edu)**

7

8

## 9 Abstract

10

11 Transposable elements (TE) are mobile genetic parasites whose unregulated activity in the  
12 germline causes DNA damage and sterility. In multiple species of *Drosophila*, *P*-element  
13 transposition in larval primordial germ cells (PGCs), as well as adult germline stem cells  
14 (GSCs), leads to the loss of both cell types and in extreme cases: agametic gonads. While  
15 much is known about the regulation of *P*-element transposition by piRNAs, less is known about  
16 tolerance factors that could allow PGCs or GSCs to persist in the face of high transposition  
17 rates. Using a panel of highly recombinant inbred lines of *Drosophila melanogaster*, we  
18 identified two linked quantitative trait loci (QTL) associated with natural variation in tolerance to  
19 *P*-element transposition. By comparing the total RNA and small RNA pools of multiple tolerant  
20 and sensitive genotypes, we found that sensitive genotypes upregulate histones and  
21 translational machinery, while tolerant genotypes upregulate chorion proteins. We further  
22 observed that sensitive genotypes exhibit increased expression of pericentromeric genes,  
23 suggesting reduced heterochromatin formation. Based on these differentially expressed genes  
24 and functional classes, location within a QTL, and in-phase single nucleotide polymorphisms  
25 (SNPs), we identified two candidate genes that we propose influence tolerance: *brat* and  
26 *Nipped-A*. Both candidates are known interactors of the tolerance factor *myc*, a conserved  
27 transcription factor whose activity promotes the retention of PGCs that are damaged by *P*-  
28 element transposition. *brat* is a translational repressor of *myc*, whereas *Nipped-A* is a co-factor  
29 that promotes the expression of genes involved in stem cell self renewal. *Nipped-A* also  
30 contributes to double-strand break (DSB) repair as a member of the Tat interactive protein 60-  
31 kDa (TIP60) complex, which could promote tolerance by repairing damage caused by  
32 transposition. Together our findings reveal complex underpinnings to natural variation in  
33 tolerance, including the modulated regulation of stem cell maintenance and DNA repair  
34 pathways.

35

36

37

38

39

## 40 INTRODUCTION

41  
42 Transposable elements (TE) are mobile DNA sequences that spread through host  
43 genomes by replicating in germline cells. Although individual TE insertions are sometimes  
44 beneficial, genomic TEs are foremost genetic parasites (reviewed in Chuong et al., 2017).  
45 Unrestricted transposition not only produces deleterious mutations, but also double-stranded  
46 breaks (DSBs) that lead to genotoxic stress in developing gametes. Generally, hosts avoid the  
47 fitness costs of invading parasites, pathogens and herbivores by two distinct mechanisms:  
48 resistance and tolerance (Mauricio, 2000; Råberg, 2014; Roy & Kirchner, 2000). Resistance  
49 reduces parasite proliferation, whereas tolerant individuals experience reduced fitness costs  
50 from parasitism. With respect to TEs, host resistance has been the focus of extensive research,  
51 and occurs through production of regulatory small RNAs that transcriptionally and post-  
52 transcriptionally silence TEs in the germline (Brennecke et al., 2007; Malone & Hannon, 2009;  
53 Nishida et al., 2007). By contrast, tolerance mechanisms that could ameliorate the fitness costs  
54 of transposition during gametogenesis remain largely unstudied.

55  
56 The absence of research on tolerance in part reflects the ubiquity of resistance. For  
57 example, in *Drosophila melanogaster*, where resistance to TEs is extensively studied, all  
58 actively-transposing TE families are silenced in developing gametes by the Piwi-interacting RNA  
59 (piRNA) pathway (Brennecke et al., 2007). In the presence of strong resistance that represses  
60 transposition, individual differences in tolerance will not be apparent. Therefore, we make use of  
61 the P-M hybrid dysgenesis system in *Drosophila melanogaster*, where resistance to *P*-element  
62 DNA transposons is short-circuited in the absence of maternally-transmitted piRNAs (reviewed  
63 in Kelleher, 2016). When males bearing genomic *P*-elements (*P*-strain) are mated to naive  
64 females lacking *P*-elements and corresponding piRNAs (*M*-strain), they produce dysgenic  
65 offspring that do not regulate *P*-element transposition in germline cells (Brennecke et al., 2008).  
66 A range of fertility effects result from *P*-element induced DNA damage, including the complete  
67 loss of germline cells (Kidwell et al., 1977). The ability of an individual to produce gametes  
68 despite *P*-element transposition is therefore a measure of tolerance.

69  
70 Recent forward genetic studies of dysgenic germline loss have revealed potential  
71 mechanisms of *P*-element tolerance. Mutations in checkpoint kinase 2 (*chk2*), a key factor in  
72 germline response to DSBs, suppresses germline loss in dysgenic females (Moon et al., 2018;  
73 Tasnim & Kelleher, 2018). While the gametes produced by the dysgenic females are inviable  
74 due to unrepaired DNA damage, these observations suggest that enhanced DSB repair in  
75 germline cells could provide tolerance. Alternatively, tolerance could arise by weakening the  
76 connection between DNA damage and germline loss, allowing dysgenic individuals to maintain  
77 gametogenesis but produce gametes with more mutations. For example, overexpression of the  
78 stem cell self-renewal factor *myc* is associated with suppressed germline loss in dysgenic males  
79 and females, resulting in the production of additional gametes that exhibit more *P*-element  
80 transpositions (Ota & Kobayashi, 2020).

81  
82 Natural variation in hybrid dysgenesis provides another opportunity to study tolerance. In  
83 particular, the degree of dysgenic sterility differs among *M*-strains, with germline loss being less

84 prevalent in the offspring of some maternal genotypes (Anxolabéhère et al., 1988; Ignatenko et  
85 al., 2015; Kelleher et al., 2018; Kidwell, M.G., Frydryck, T., and Novy, J.B., 1983). This suggests  
86 the presence of natural tolerance alleles. Using a panel of highly recombinant inbred lines  
87 (RILs) from the *Drosophila* Synthetic Population Resource (DSPR, King et al., 2012), we  
88 recently uncovered a natural tolerance allele through quantitative trait locus (QTL) mapping  
89 (Kelleher et al., 2018). We further associated tolerance with reduced expression of *bruno*, a  
90 female germline differentiation factor whose ectopic expression in stem cells promotes their loss  
91 (Parisi et al., 2001; Wang & Lin, 2007; Xin et al., 2013). We speculated *bruno* tolerance  
92 potentially arises by desensitizing gametogenesis to DNA damage in a mechanism analogous  
93 to *myc* overexpression.

94  
95 Here we report results from QTL mapping of hybrid dysgenesis in a second,  
96 independent panel of DSPR RILs (Population B, King et al., 2012). We uncovered two QTL  
97 peaks close to the second chromosome centromere that determine tolerance to *P*-element  
98 activity in young and old females. We further interrogated the tolerance phenotype by  
99 contrasting RNA and small RNA expression between tolerant and sensitive genotypes. Finally,  
100 we combined information about expression differences, RIL genotypes, and QTL positions to  
101 identify novel candidates for natural variation in tolerance.

## 102 RESULTS

### 103 1. QTL mapping of 2<sup>nd</sup> chromosome centromere:

104  
105 The DSPR RILs are all *P*-element free M-strains, which were isolated from natural  
106 populations before the *P*-element invasion (King et al., 2012). We therefore screened for  
107 tolerant alleles among the panel B RIL genomes by crossing RIL females to males from the  
108 reference *P*-strain Harwich, and examining the morphology of the F1 ovaries (**Figure 1a**).  
109 Atrophied ovaries are indicative of germline loss resulting from *P*-element activity, while non-  
110 atrophied ovaries are indicative of tolerance (Kelleher et al., 2018; Schaefer et al., 1979). Since  
111 some females exhibit age-dependent recovery from *P*-element hybrid dysgenesis (Khurana et  
112 al., 2011), we phenotyped F1 females at two developmental time points: 3 days and 21 days  
113 post-eclosion.

114 Similar to our observations with the Population A RILs (Kelleher et al. 2018), we found  
115 continuous variation in the frequency of ovarian atrophy among dysgenic offspring of different  
116 RIL mothers, indicating genetic variation in tolerance. Based on a combined linear model of F1  
117 atrophy among 3 and 21 day old females, we estimated the broad-sense heritability of tolerance  
118 in our experiment to be ~42.5%. However, the effect of age on the proportion of F1 atrophy was  
119 significant but minimal ( $\chi^2 = 7.03$ ,  $df = 1$ ,  $p$ -value = 0.008) with 3-day-old females showing only  
120 0.7% increase in atrophy as compared to 21-day-old females. Therefore, age-dependent  
121 recovery from dysgenic sterility is not common among the genotypes we sampled.

122 To identify the genomic regions associated with genetic variation in germline tolerance,  
 123 we performed QTL analysis using the published RIL genotypes (King et al., 2012). We found a  
 124 large QTL peak near the 2<sup>nd</sup> chromosome centromere in both 3 and 21 day-old F1 females  
 125 (**Figure 1b, Table 1**). However, the intervals of the major QTL peaks, based on the  $\Delta 2$ LOD and  
 126 Bayes Credible Interval (BCI) methods (Lander & Botstein, 1989; Manichaikul et al., 2006), are  
 127 non-overlapping between the 3 and 21 day-old data sets (**Figure 1c, Table 1**). The major QTL  
 128 in 21 day-old females (hereafter, QTL-21d) resides in the euchromatic region and is quite small  
 129 (990 kb) compared to the major QTL in 3 day-old females (hereafter QTL-3d), which spans the  
 130 centromere and pericentromeric regions (9.6 Mb). Therefore, there are likely at least two  
 131 polymorphisms that influence tolerance near the 2<sup>nd</sup> chromosome centromere, one of which is  
 132 more important in young 3-day old females, and the other of which is more important in 21 day-  
 133 old females.

134 The presence of two tolerance QTL is further supported by the phenotypic classes we  
 135 detected among founder alleles (B1-B8) for each of the QTL peaks (**Figure 1e**). For QTL-21d,  
 136 both B2 and B6 founder alleles are sensitive and greatly increase dysgenic ovarian atrophy,  
 137 while all other founder alleles are tolerant. By contrast for QTL-3d, only the B6 founder allele is  
 138 associated with increased sensitivity.

139

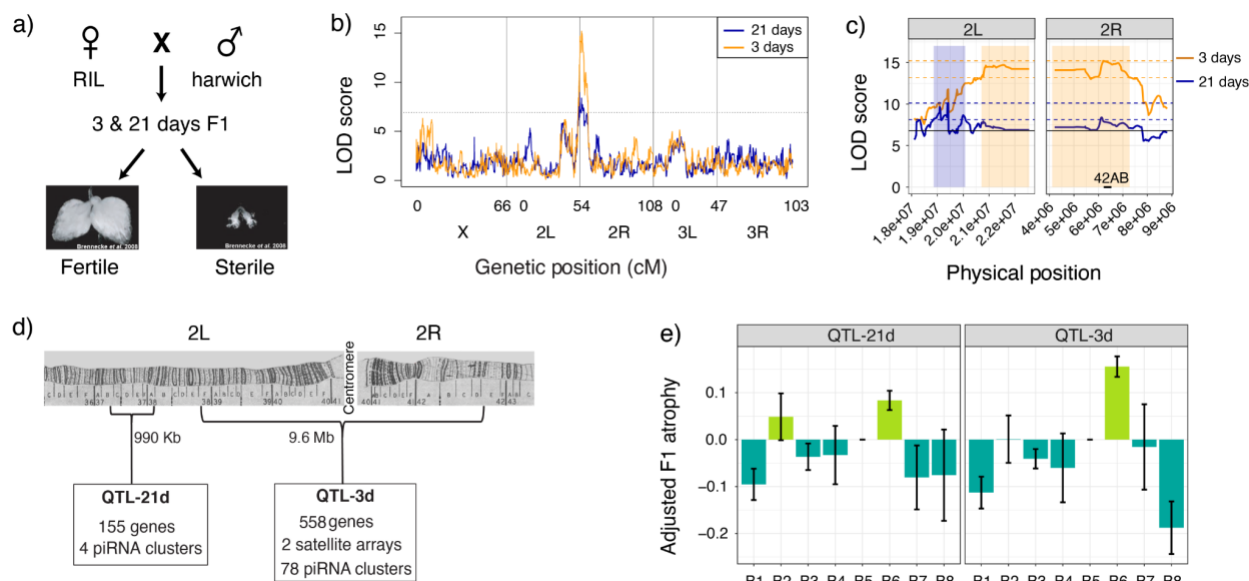

140

141 **Figure 1: QTL mapping of variation in *P*-element tolerance. a)** Crossing scheme to  
 142 phenotype the variation in tolerance to *P*-elements among the RILs by screening for ovarian  
 143 atrophy in 3 and 21 day-old dysgenic F1 females **b)** The log of odds (LOD) plot for QTL  
 144 mapping of germline tolerance using 3 day-old (orange) and 21 day-old (blue) F1 females. The  
 145 dotted line is the LOD threshold and x-axis represents the chromosomal positions. **c)** Zoomed-in  
 146 figure of QTL mapping from 3 days (orange) and 21 days (blue). The colored boxes show the

147  $\Delta 2$ LOD confidence interval of each QTL, and the pairs of dotted lines indicate the LOD peak  
148 position and the  $\Delta 2$ LOD score that determines the interval. The solid horizontal line is the LOD  
149 threshold. **d)** Cytological map depicting the interval of the two QTL peaks (Bridges, 1935;  
150 Bridges, 1942). **e)** Graph showing F1 atrophy (y-axis) associated with each of the eight founder  
151 alleles (x-axis) at the QTL peaks. All the QTL peaks show 2 phenotypic classes: a sensitive  
152 (light green) and tolerant (dark green) class. The data used to generate plot in figure **b**, **c**, and **e**  
153 are provided in **Supplemental table S3 and S4**.

| Analysis | LOD Score | Peak Position | $\Delta 2$ LOD CI              | BCI                            | % variation |
|----------|-----------|---------------|--------------------------------|--------------------------------|-------------|
| 3-day    | 15.2      | 2R:6,192,495  | 2L:20,710,000-<br>2R:7,272,495 | 2L:20,820,000-<br>2R:6,942,495 | 11.13       |
| 21-day   | 10.13     | 2L:19,420,000 | 2L:19,170,000-<br>20,080,000   | 2L:19,010,000-<br>20,000,000   | 9.78        |

154 **Table 1: QTL positions for tolerance in 3 and 21-day old females.** The peak position,  
155  $\Delta 2$ LOD drop confidence interval ( $\Delta 2$ LOD CI), and the Bayesian Credible Interval (BCI) in dm6  
156 are provided for each analysis. The data used to identify the LOD peaks and intervals for 3 and  
157 21-day old females can be found in **Supplemental table S3 and S4**, respectively.

## 158 2. Sensitive and tolerant alleles exhibit differential expression 159 of genes involved in chorion formation and chromatin 160 packaging.

161  
162 Both the QTL regions contain large numbers of protein coding and non-coding RNA  
163 genes, piRNA clusters, and repeats, which could influence tolerance (**Figure 1d**). To better  
164 understand the tolerance phenotype, we examined differential gene expression between  
165 tolerant and the sensitive QTL alleles. We identified three pairs of nearly isogenic lines (NILs),  
166 which carried either a sensitive (B6) or tolerant (B4) QTL haplotype across the QTL region (dm6  
167 2L:19,010,000-2R:7,272,495) in otherwise similar genetic backgrounds. We then performed  
168 RNA-seq on ovaries of 3-5 day-old females (3 biological replicates). Principal component  
169 analysis (PCA) of read counts reveals two independent axes that resolve sensitive and tolerant  
170 genotypes, which together account for 40% and 16% of variation (**Figure 2a**). One biological  
171 replicate of RIL 21188 (tolerant) was an outlier, which we excluded from our downstream  
172 analysis of differentially expressed genes.

173 We found a total of 530 genes differentially expressed between sensitive and tolerant  
174 genotypes (Benjamini-Hochberg adjusted  $p$ -value  $\leq 0.05$ , fold-change  $> 1.5$ ). The most  
175 significantly enriched GO term among genes upregulated in tolerant genotypes is chorion  
176 assembly (Bonferroni corrected  $P$  value  $< 0.01$ , **Figure 2b, Supplemental table S7: full report**).

177 Indeed, all of the major chorion genes were found to be significantly upregulated in the tolerant  
178 genotypes (**Figure 2c**, Tootle et al. 2011; Kim et al. 2011). It is unlikely that chorion assembly  
179 impacts dysgenic ovarian atrophy, since chorion synthesis occurs in late-stage oocytes (stages  
180 10B-14, G. L. Waring, 2000), whereas atrophy results from the loss of larval primordial germline  
181 cells and subsequent germline stem cells (GSCs) (Dorogova et al., 2017; Ota & Kobayashi,  
182 2020; Tasnim & Kelleher, 2018; Teixeira et al., 2017). However, chorion genes reside in clusters  
183 that undergo amplification (Claycomb et al., 2004; Spradling, 1981), a process that relies on the  
184 efficient repair of DSBs at the boundaries of an amplified region (Alexander et al., 2015).  
185 Therefore, upregulation of chorion genes in tolerant genotypes could indicate more efficient  
186 DSB repair, which might off-set the impact of *P*-element transposition.

187  
188 Genes upregulated in the sensitive genotypes are enriched for functions in chromatin  
189 assembly and transcription, cell division, and translation. A careful inspection of genes  
190 underlying these enriched terms reveals that with the exception of translation, they are majorly  
191 driven by the increased expression of replication-dependent (RD) histone gene copies (**Figure**  
192 **2d**). Overexpression of RD histones is associated with increased sensitivity to DNA damage in  
193 yeast (Gunjan & Verreault, 2003; Liang et al., 2012), mice (Murga et al., 2007) and *Drosophila*  
194 (Landais et al., 2014; Ozawa et al., 2016). Therefore, histone upregulation exhibited by sensitive  
195 alleles may reduce their tolerance to genotoxic stress resulting from *P*-element activity. Notably,  
196 the expression of both histone and chorion genes are increased in late oogenesis (Ambrosio &  
197 Schedl, 1985; Potter-Birriel et al., 2020; Ruddell & Jacobs-Lorena, 1985; Gail L. Waring, 2000),  
198 meaning that their inverted differential expression between sensitive and tolerant genotypes  
199 cannot be explained by differential abundance of late stage oocytes.

200  
201 The *D. melanogaster* histone gene cluster is located the pericentromeric region of QTL-  
202 3d and consists of ~100 copies of a 5-kb cluster containing each of the 5 RD histones (*his1*,  
203 *his2A*, *his2B*, *his3* and *his4*). However, the differential regulation of histones is unlikely to reflect  
204 the presence of a *cis*-regulatory variant within the QTL, since the histone gene cluster is exhibits  
205 coordinated and dosage compensated regulation in a unique nuclear body called the histone  
206 locus body (HLB; McKay et al., 2015). Rather, we postulated that sensitive and tolerant alleles  
207 may differ in heterochromatin formation, since many negative regulators of histone gene  
208 transcription are also suppressors of position effect variegation (Su(var), Ner et al., 2002)  
209 (Ozawa et al., 2016). In support of this model, sensitive (B6) genotypes exhibit increased  
210 expression of pericentromeric genes, as well as genes on the heterochromatic 4th chromosome  
211 (**Figure 2e**). We also discovered increased expression of pericentromeric genes associated with  
212 the B6 haplotype in a previously published microarray dataset from head tissue (King et al.,  
213 2014, **Supplemental figure S1**), suggesting B6 is unusual among the founder alleles in  
214 exhibiting reduced heterochromatin formation.

215

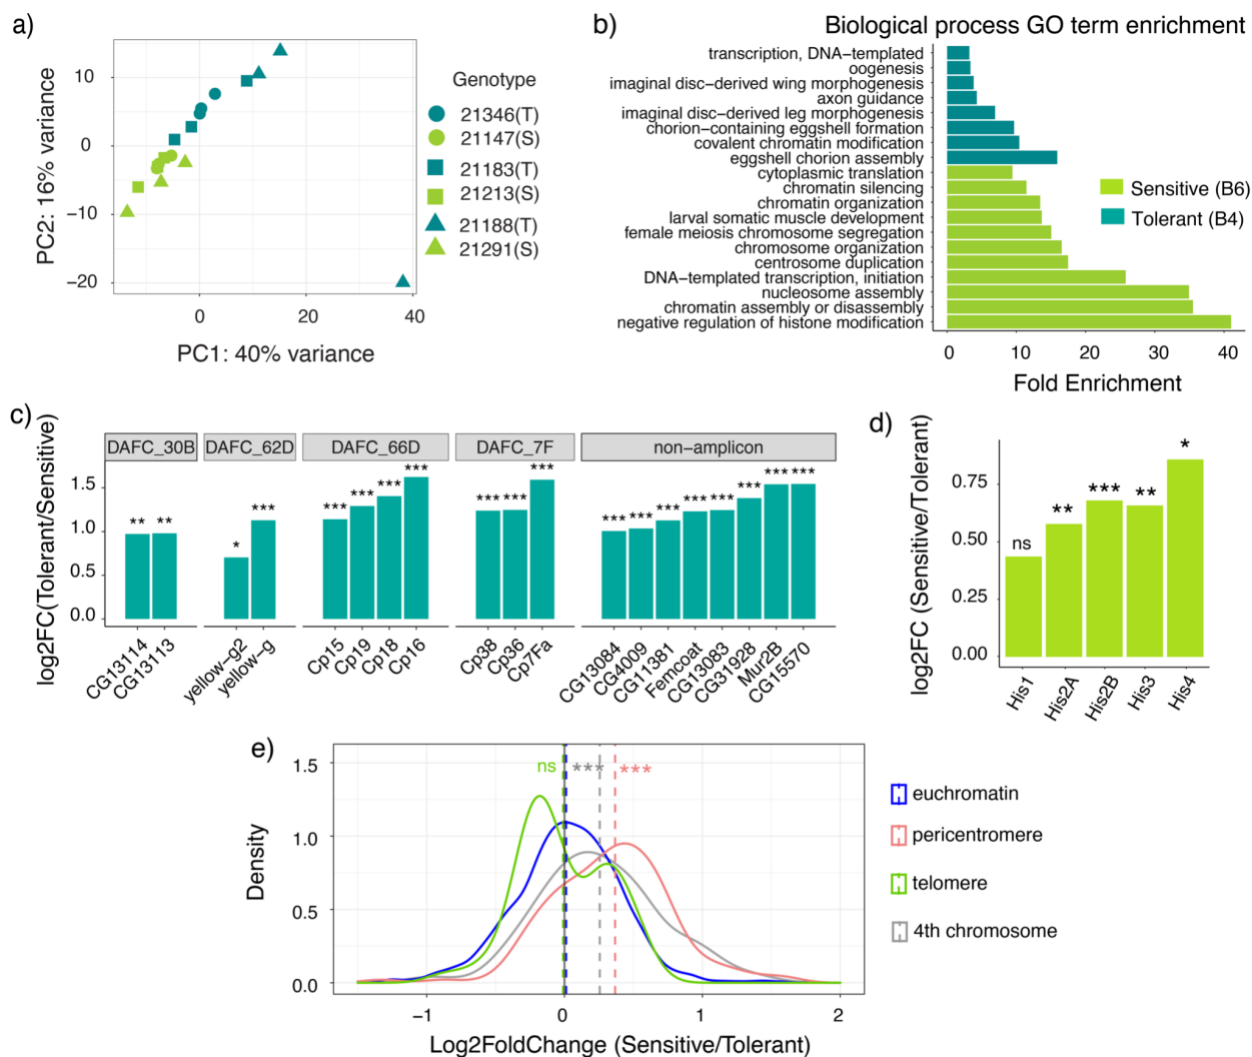

216  
217

218 **Figure 2: Tolerance is associated with upregulated chorion proteins, whereas sensitivity**  
 219 **is associated with upregulated replication-dependent histones. a)** PCA analysis of gene  
 220 expression data of S/sensitive and T/ tolerant genotypes. Members of the same NIL pair are  
 221 represented by the same shape. **b)** GO terms enriched among genes upregulated in tolerant  
 222 and sensitive genotypes. **c)** Log2 fold change increase in expression in tolerant genotypes for  
 223 chorion genes residing in the four amplicons (*Drosophila* Amplicons in Follicle Cells, DAFCs) as  
 224 well as outside amplicons (Kim et al., 2011; Tootle et al., 2011). **d)** Log2 fold change increase in  
 225 RD histone expression in sensitive genotypes. **e).** Probability density plot of log2 fold change  
 226 values for all euchromatic (blue), pericentromeric (red), telomeric (green) genes and 4th  
 227 chromosome (gray) between strains carrying sensitive and tolerant alleles. The mean of each  
 228 distribution is represented by a dotted line. Sensitive genotypes display significantly higher  
 229 expression of pericentromeric genes (two-sample t-test,  $t_{141} = -9.32$ ,  $p$ -value =  $2.335e-16$ ) and  
 230 4th chromosome genes (two-sample t-test,  $t_{53} = -4.56$ ,  $p$ -value =  $3.014e-05$ ) when compared to  
 231 euchromatic genes. For **e)** the x-axis boundaries were confined from (-1.5 to 2) for a better  
 232 visualization. The pericentromere-euchromatin boundaries were drawn from (Hoskins et al.,  
 233 2015; Riddle et al., 2011) and subtelomeric-euchromatin boundary coordinates from (Karpen &



234 Spradling, 1992; Walter et al., 1995; Yin & Lin, 2007). The data represented in panel **a** is  
235 provided in **Supplemental table S14** and plot in panel **c, d, and e** in **Supplemental table S5**).

### 236 3. piRNA clusters in QTL-3d exhibit differential activity that 237 does not translate to TE deregulation.

238 The pericentromeric region is rich in piRNA clusters, and the QTL-3d region itself  
239 harbors 78 piRNA clusters. Particularly, the major piRNA cluster, *42AB*, lies very close (~65kb  
240 distal) to the QTL-3d peak position. Although the RIL mothers do not produce or transmit *P*-  
241 element-derived piRNAs, the *D. melanogaster* genome harbors more than 100 distinct resident  
242 TE families (Kaminker et al., 2002; Quesneville et al., 2005) that are also regulated by piRNAs  
243 (Brennecke et al., 2007). If sensitive alleles of piRNA clusters within QTL-3d exhibit reduced  
244 silencing of resident (non *P*-element) TEs, resulting transposition could enhance genomic  
245 instability triggered by *P*-element activity. We therefore evaluated whether tolerant and sensitive  
246 alleles differ in the activity of piRNA clusters using small RNA-seq. A PCA of piRNA cluster  
247 expression reveals that sensitive and tolerant genotypes are resolved by the second principal  
248 component, accounting for 22% variation in expression (**Figure 3a**).

249 We did not find evidence that QTL-3d is explained by the differential activity of piRNA  
250 cluster *42AB*, as sensitive and tolerant genotypes exhibited comparable piRNA abundances  
251 from this locus. Similarly, piRNA abundance from other major piRNA clusters outside the QTL  
252 do not differ between sensitive and tolerant alleles (**Figure 3b**). However, we discovered two  
253 small pericentromeric piRNA clusters located within QTL-3d that were active in tolerant  
254 genotypes but largely quiescent in sensitive genotypes (**Figure 3b, c and d; Supplemental**  
255 **figure S2-3**). While these piRNA clusters contain no annotated TE insertions in the reference  
256 genome (dm6), Repbase Censor (Kohany et al., 2006) reveals they are largely composed of TE  
257 fragments. The majority (~77%) of these TE fragments are relatively divergent from the  
258 consensus (0.65-0.95 sequence similarity; **Supplemental table S9**), and are often most similar  
259 to consensus TEs from other (non-*melanogaster*) *Drosophila* species. Given that  
260 transpositionally active TE families are often highly similar to the consensus sequence  
261 (Bergman & Bensasson, 2007), and piRNA silencing is disrupted by mismatches between the  
262 piRNA and its target (Post et al., 2014), this suggests that the differential activity of these two  
263 piRNA clusters is unlikely to impact the expression of transpositionally active TEs.

264 To further evaluate if differences in tolerance are related to resident TE regulation, we  
265 compared resident TE expression between sensitive and tolerant genotypes in our RNA-seq  
266 data. None of the TE families represented in the QTL piRNA clusters were upregulated in  
267 sensitive genotypes (**Figure 3e**). Furthermore, while some TE families are differentially  
268 expressed, there is no systematic increase in TE activity in the sensitive genotypes. Rather,  
269 more TE families are upregulated in tolerant genotypes (13 TEs) when compared to sensitive (4  
270 TEs) genotypes. Therefore, despite the conspicuous position of QTL-3d surrounding piRNA  
271 producing-regions, as well as evidence for differential heterochromatin formation that could  
272 impact piRNA biogenesis (**Figure 2b and e**), we find no evidence that tolerance is determined  
273 by resident TE silencing.

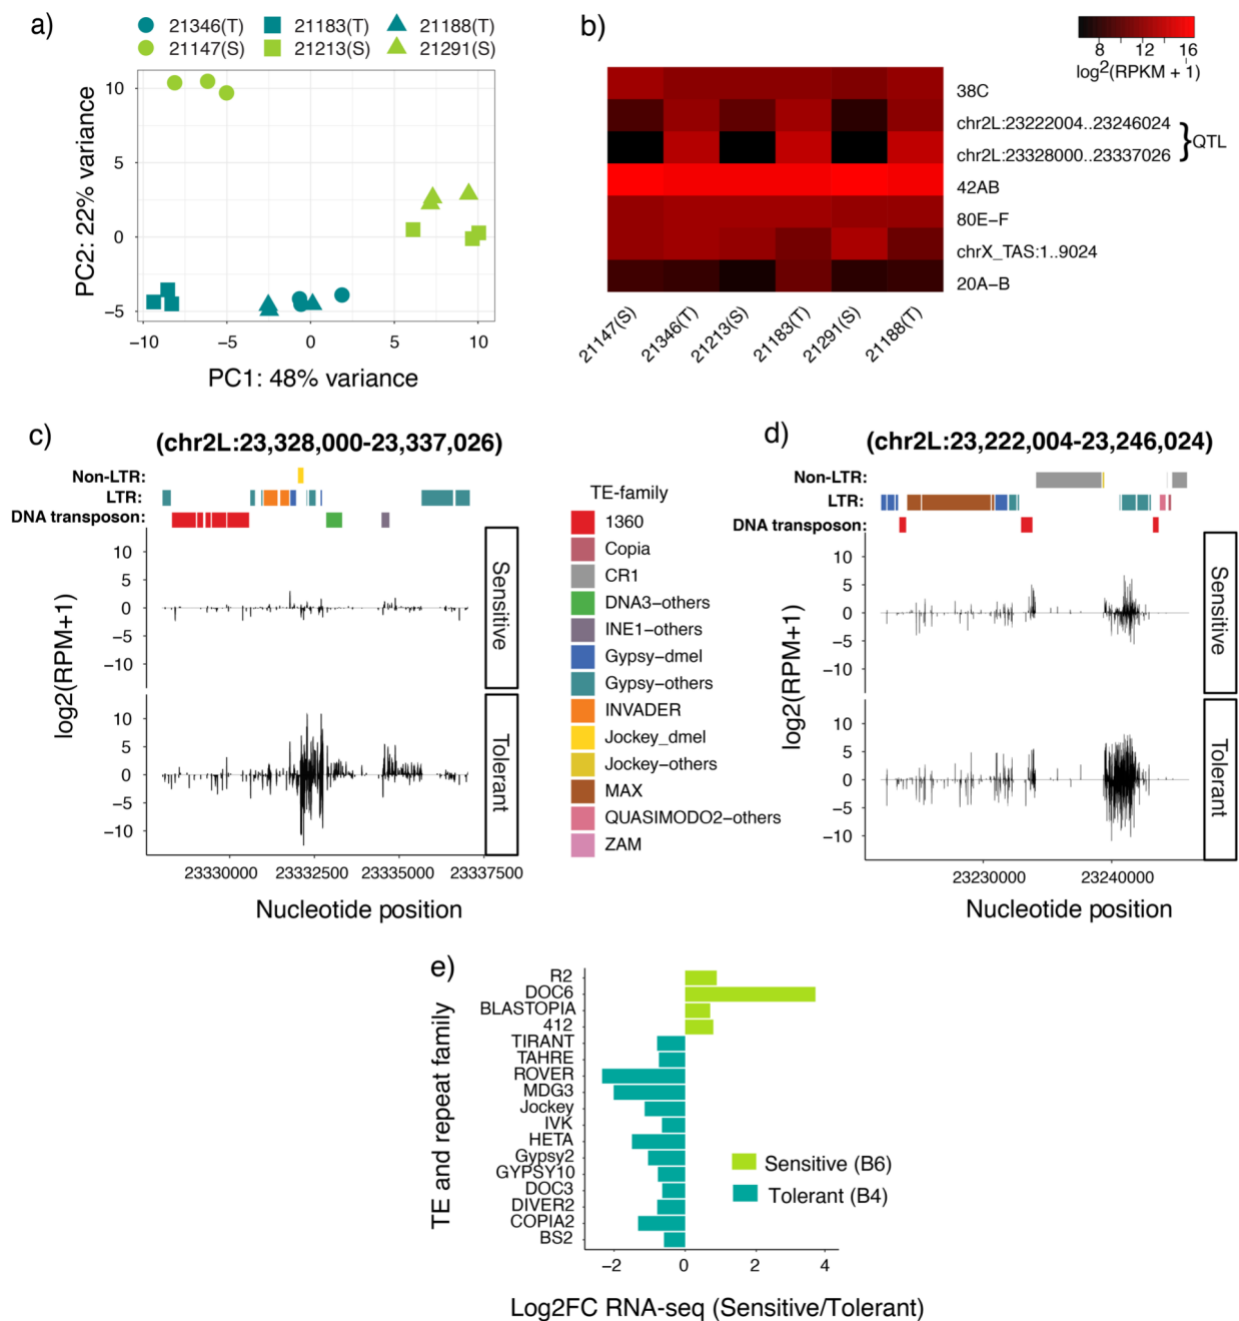

274

275 **Figure 3: Tolerance is not determined by differential activity of piRNA cluster or TE**  
 276 **deregulation.** **a)** PCA analysis for piRNA cluster expression data of S/sensitive and T/ tolerant  
 277 genotypes. The NIL pairs are represented by the same shapes. **b)** Heat map showing the  
 278 expression of seven piRNA clusters. NIL pairs that are compared are plotted adjacent to each  
 279 other. **c and d)** represent the piRNA expression between sensitive and tolerant genotypes from  
 280 one of the NIL pairs along the two QTL piRNA clusters: 2L:23,328,000-23,337,026 and  
 281 2L:23,222,004-23,246,024, respectively. Only uniquely mapping piRNAs are considered. The  
 282 TE families at the top of each figure are represented by different colors. TE-others represent the  
 283 repeat families coming from sibling species of *D. melanogaster*. Positive value indicates piRNAs

284 mapped to the sense strand of the reference genome and negative value indicates those from  
285 the antisense strand. See **Supplemental figure S2-3** for cluster expression in the remaining  
286 NIL pair. For **b, c and d**, piRNA cluster expression levels are estimated by log<sub>2</sub> scale  
287 transformed of reads per million mapped reads [ $\log_2(\text{RPM}+1)$ ]. **e)** Bar graph depicting  
288 differentially expressed TEs (fold change = 1.5, base mean  $\geq 100$ , adjusted  $p$ -value  $\leq 0.05$ )  
289 between sensitive and tolerant genotypes. The data used to plot panel **a** is provided in  
290 **Supplemental table S15**, for panel **b** in **Supplemental table S8**, for panel **c** and **d** in  
291 **Supplemental table S16 and S9**, and for panel **e** in **Supplemental table S10**)

## 292 4. Identifying candidate genes influencing tolerance

293 In the absence of an obvious role for piRNA clusters within the QTL in determining  
294 tolerance, we sought to identify candidate genes that explain the associated phenotypes. We  
295 first identified “in-phase” single nucleotide polymorphisms (SNPs), where the genotypic  
296 differences among the founder alleles are consistent with their tolerance phenotypes (**Figure**  
297 **4b**, Long et al., 2014). We identified 64 and 258 genes with in-phase SNPs in QTL-21d and 3d,  
298 respectively. These polymorphisms potentially impact either gene expression—by residing  
299 within the regulatory/intron region—or affect the activity of the encoded protein through non-  
300 synonymous mutations (**Supplemental table S11, S12, and S13**).

301 To further narrow down the candidates, we similarly identified differentially expressed  
302 genes with the QTL. Of 530 genes differentially expressed (**Figure 4a**), 43 are within the QTL,  
303 representing an approximately five-fold enrichment in the QTL regions compared to the rest of  
304 the genome (Pearson’s Chi-squared test,  $X\text{-squared} = 255.54$ ,  $df = 1$ ,  $p\text{-value} < 2.2e\text{-}16$ , **Figure**  
305 **4a**). Ultimately, we identified 5 and 14 differentially expressed genes that also carry in-phase  
306 SNPs within the QTL-21d and 3d, respectively (**Figure 4c and d; Supplemental table 12**).  
307 These genes, along with those carrying non-synonymous in-phase SNPs, make up the  
308 strongest candidate genes influencing tolerance (**Figure 2b; Supplemental table 13**).

309 We next scoured our list of candidate genes for those with known functions in  
310 heterochromatin formation and DNA damage response, whose differential function or regulation  
311 are plausibly related to gene expression differences associated with sensitive and tolerant  
312 alleles. We similarly looked for genes with known functions in germ cell maintenance or  
313 differentiation, which is a critical determinant of the dysgenic phenotype (Ma et al., 2017; Rojas-  
314 Ríos et al., 2017; Tasnim & Kelleher, 2018). We found only candidate two genes: *brat* within  
315 QTL-21d and *Nipped-A* within QTL-3d, that have functions in determining germ cell fate (Harris  
316 et al., 2011; McCarthy et al., 2018). Interestingly, *Nipped-A* is a member of the Tat interacting  
317 protein 60 kD (TIP60) complex, which has additional roles in DSB repair and heterochromatin  
318 formation (Hanai et al., 2008; Qi et al., 2006; Ruhf et al., 2001; Sinclair et al., 1998). Moreover,  
319 we found four other members and interactors of TIP60 complexes that are also upregulated in  
320 tolerant genotypes (*dRSF-1/CG8677*, *dom*, *E(Pc)* & *DMAP1*) (Hanai et al., 2008; Kusch et al.,

321 2004), and one that is upregulated in sensitive (*yeti*) (Messina et al., 2014). Of these, *yeti* and  
 322 *dRSF-1* are also located in QTL-3d.  
 323  
 324

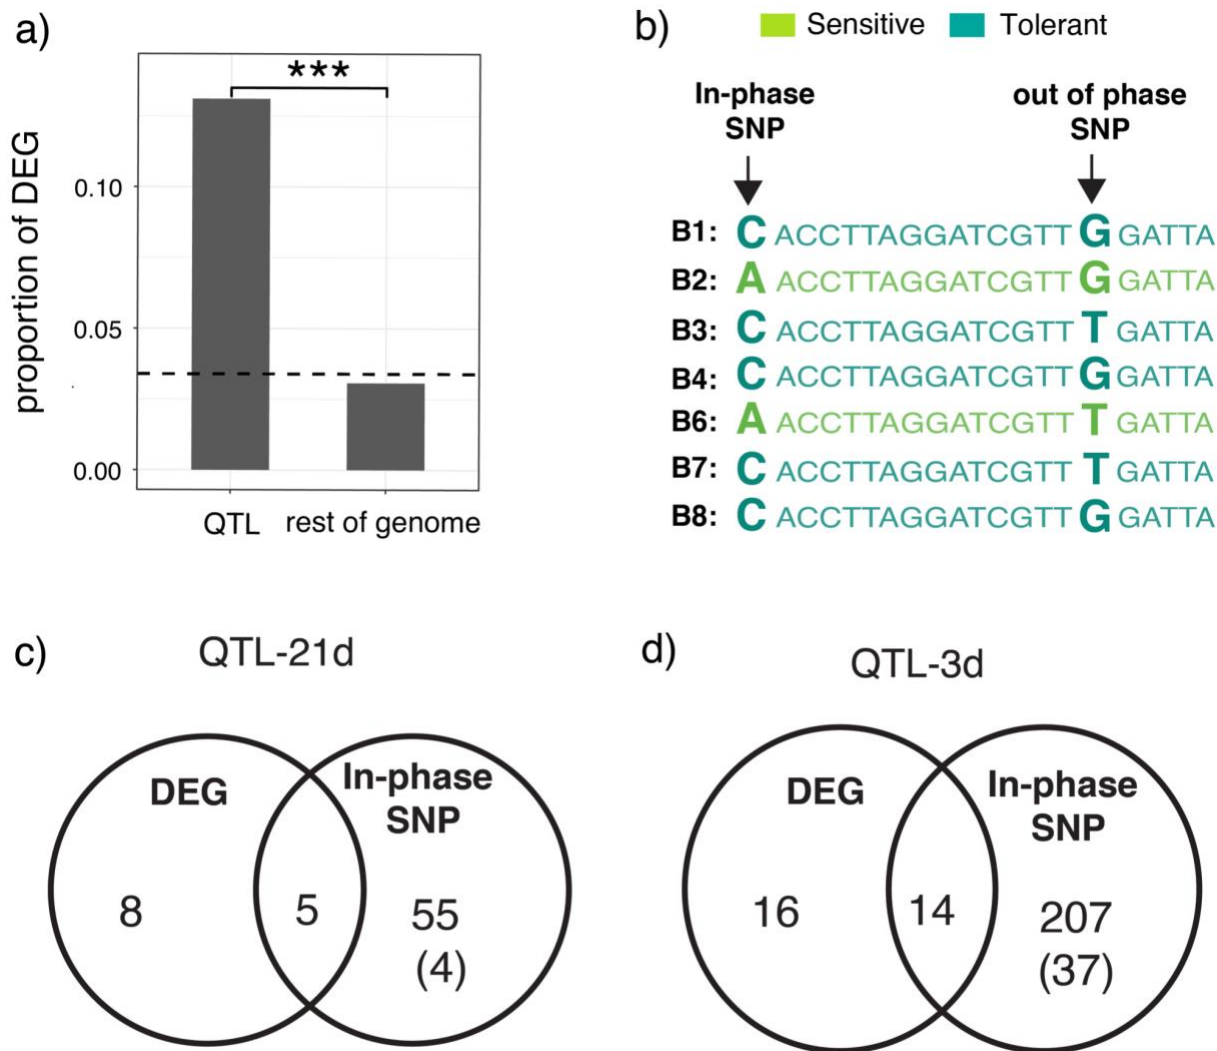

325  
 326 **Figure 4: Differential expression and in-phase SNPs identify candidate genes that**  
 327 **determine tolerance. a)** Bar graph showing enrichment of differentially expressed genes in  
 328 QTL. The dotted line is the genome wide average. **b)** Schematics representing the in-phase and  
 329 out of phase SNPs, where each row represents the genotype of the eight B founder strains and  
 330 the letters in bold indicates SNP alleles. The founders are colored based on their phenotypic  
 331 classification, either tolerant or sensitive (**Figure 1e**). **c and d)** Venn diagram showing the  
 332 overlap of differentially expressed genes (DEG) and genes carrying in-phase SNPs for QTL-21d  
 333 and QTL-3d, respectively. The number within the brackets indicates the genes carrying non-  
 334 synonymous in-phase SNPs. The data for differential expression of genes for tolerant and  
 335 sensitive genotypes is provided in **Supplemental table S5**. The data on in-phase  
 336 polymorphisms for each QTL peak are provided in **Supplemental table S11**. List of candidate

337 genes that have both in-phase polymorphisms and are differentially expressed, and those  
338 having non-synonymous in-phase polymorphisms are provided in **Supplemental table S12** and  
339 **S13**, respectively.

340  
341

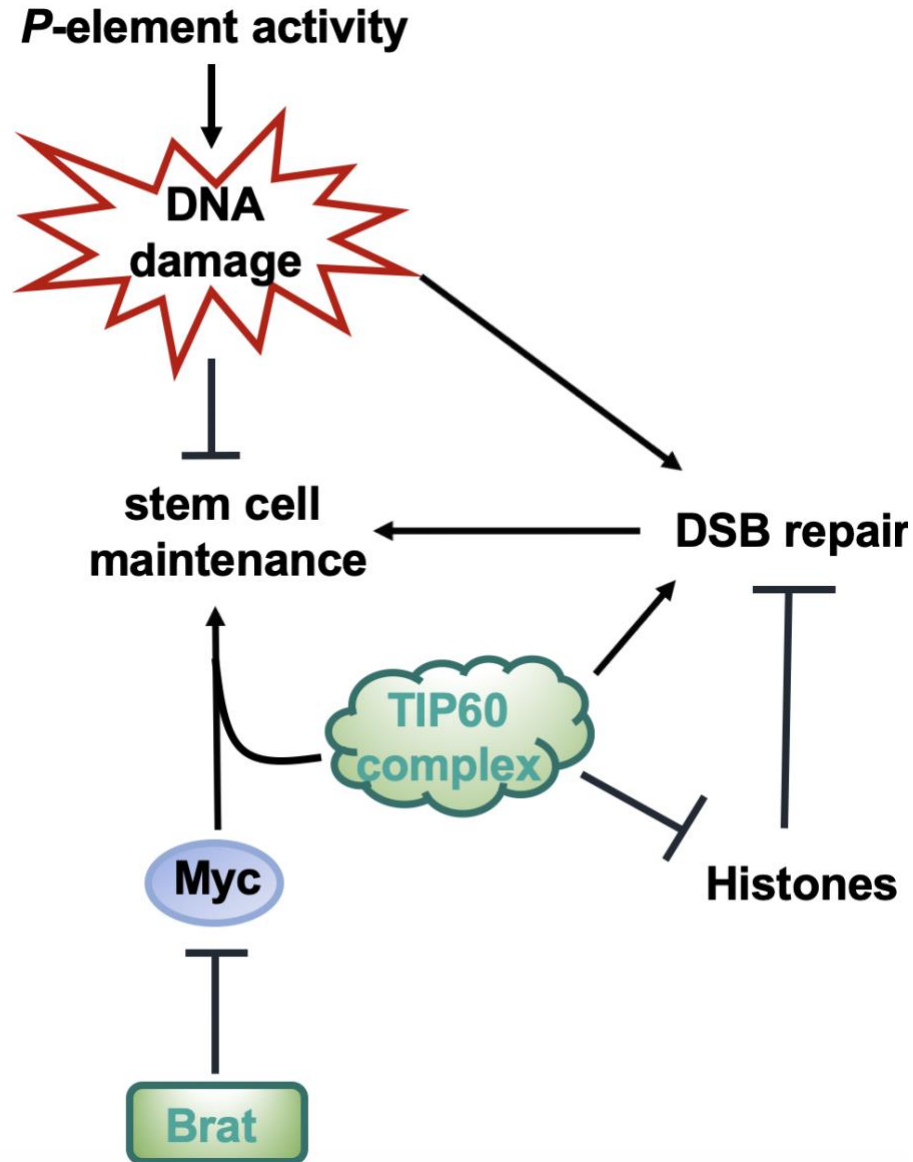

342  
343  
344  
345  
346  
347

**Figure 5: A model of TE tolerance in Population B RILs.** *brat* and the TIP60 complex (containing Nipped-A) are proposed to determine TE tolerance through the modulation of Myc-dependent stem cell self-renewal or DSB repair (TIP60 only).

## 348 Discussion

349  
350 Although small RNA mediated TE regulation is widely studied, little is known about  
351 cellular and molecular mechanisms that confer tolerance to transposition. Here we uncovered  
352 natural variation in tolerance to *P*-element DNA transposons, which is associated with two or  
353 more loci proximal to the second chromosome centromere in *D. melanogaster*. We further  
354 showed that tolerant and sensitive genotypes may differ in their ability to form heterochromatin  
355 and enact DNA repair, explaining their differential responses to *P*-element transposition. Finally,  
356 we identified candidate genes in each QTL that potentially determine the phenotypic differences  
357 between tolerant and sensitive alleles. *Nipped-A*, located in QTL-3d, is a member of TIP60  
358 complex and has a non-synonymous in-phase SNP that could alter the activity of encoded  
359 protein. By contrast, *brat*, located in QTL-21d, has in-phase SNPs in its intronic and  
360 downstream regulatory regions, and is upregulated in the tolerant genotypes.

361  
362 *Nipped-A* (QTL-3d) could influence tolerance by promoting the maintenance of larval  
363 PGCs or early adult GSCs, which are destabilized by DNA damage (Ma et al., 2016; Ota &  
364 Kobayashi, 2020). *Nipped-A* is required for female germ cell maintenance (Yan et al., 2014), as  
365 well as maintenance of larval neuroblasts and adult intestinal and male germline stem cells  
366 (Prado et al., 2013; Rust et al., 2018; Tauc et al., 2017). While the functional consequences of  
367 the non-synonymous SNP that separates tolerant and sensitive *Nipped-A* alleles is not clear,  
368 the upregulation of four other TIP60 members (*dRSF-1*, *dom*, *E(Pc)* & *DMAP1*) suggests  
369 increased activity in the tolerant genotypes (**Supplemental table S6**). Reduced expression of  
370 pericentromeric genes in tolerant strains also suggests increased TIP60 activity, since TIP60 is  
371 involved in heterochromatin formation (Hanai et al., 2008; Qi et al., 2006; Ruhf et al., 2001;  
372 Sinclair et al., 1998).

373  
374 While the specific function of TIP60 in female germ cell maintenance is not clear, TIP60  
375 is a conserved interactor of Myc: a transcription factor with diverse and well-studied roles in  
376 tumorigenesis, cell growth and proliferation, cell competition and apoptosis (reviewed in Gallant,  
377 2013; Grifoni & Bellosta, 2015). In larval neuroblasts, TIP60 and Myc coregulate downstream  
378 targets that promote stem cell self-renewal (Rust et al., 2018). Similarly, *myc* overexpression  
379 confers tolerance in dysgenic larval gonads by suppressing primordial germ cell (PGC) loss  
380 (Ota & Kobayashi, 2020). Thus, increased TIP60 function in tolerant genotypes may activate  
381 *myc*-dependent tolerance in larvae.

382  
383 Interestingly, *brat* (QTL 21d) is a translational repressor of *myc* that is upregulated in  
384 tolerant ovaries (**Supplemental figure S5 and S12**). Conversely, increased expression of  
385 translational machinery suggests increased Myc activity in sensitive ovaries as ribosomal  
386 proteins are conserved downstream targets of Myc (**Figure 2B**; Orian et al., 2003). Our data  
387 therefore, point to an association between reduced Myc activity and tolerance in adult stages.  
388 While puzzling, the impact of Myc activity on cellular persistence is context and cell type  
389 specific. For example, reduced Myc activity confers robustness to X-ray induced apoptosis in  
390 larval eye imaginal discs, while Myc overexpression in the same tissue induces apoptosis

391 (Montero et al., 2008). Therefore, the modulation of Myc function over the course of  
392 development may be a critical determinant of tolerance, with TIP60-dependent regulation of  
393 self-renewal factors increasing tolerance in PGCs, while other Myc targets may decrease  
394 tolerance in adults (**Figure 5**). Exploring potential interactions between TIP60, Myc and Brat in  
395 determining tolerance presents an enticing avenue for future work.

396  
397 In addition to promoting germ cell maintenance, *Nipped-A* might also influence tolerance  
398 by facilitating repair of DSBs in PGCs or GSCs. The TIP60 complex has a conserved function in  
399 DSB repair (Kusch et al., 2004; Sun et al., 2009), and *Nipped-A* in particular promotes the  
400 proliferation of intestinal stem cells after DNA damage (Tauc et al., 2017). By contrast, histone  
401 upregulation in the sensitive genotypes—which potentially results from reduced TIP60-  
402 dependent heterochromatin formation—could inhibit DNA repair. Surplus RD histones are  
403 proposed to interfere with DNA-repair machinery, and are considered genotoxic outside of S-  
404 phase (Kumar et al., 2020; Landais et al., 2014; Liang et al., 2012). Enhanced repair in tolerant  
405 genotypes is further supported by the increased expression of chorion genes, since chorion  
406 gene amplification during oogenesis is dependent upon DSB repair (Alexander, Barrasa & Orr-  
407 Weaver 2015).

408  
409 In summary, our work suggests that tolerance to transposition may have a complex  
410 architecture, including both the concurrent modulation of Myc-dependent stem cell self renewal  
411 and stem cell loss, and the enhanced repair of DSBs. This complexity contrasts our previous  
412 study of natural variation in the population A RILs of the DSPR, which uncovered a major effect  
413 of the expression of a single differentiation factor, *bruno*, on tolerance (Kelleher et al., 2018).  
414 Furthermore, while DNA damage signaling is a clear determinant of dysgenic germ cell loss  
415 (Dorogova et al., 2017; Moon et al., 2018; Tasnim & Kelleher, 2018), the potential for natural  
416 variation DNA repair to offset the mutagenic effects of transposition has never been evaluated.  
417 Our observations therefore point to multiple new mechanisms through which cells could  
418 withstand the genotoxic effects of unregulated transposition.

## 419 Methods

420  
421 ***Drosophila* Strains and Husbandry.** The recombinant inbred lines (RILs) were generously  
422 provided by Stuart Macdonald. Harwich (#4264) was obtained from the Bloomington *Drosophila*  
423 stock center. All flies were maintained in standard cornmeal media.

424  
425 **Phenotyping.** Phenotyping was performed as described previously in Kelleher *et al* (2018).  
426 Briefly, crosses between virgin RIL females and Harwich males were transferred to fresh food  
427 every 3-5 days. Since crosses reared at a restrictive temperature (29 °C) result in complete  
428 gonadal atrophy in F1 offspring, we reared our crosses at a lower permissive temperature (25  
429 °C), which produces an intermediate phenotype that better reveals the variation in severity of  
430 dysgenesis (Dorogova et al., 2017; Kelleher et al., 2018; Kidwell et al., 1977; Srivastav &  
431 Kelleher, 2017). F1 offspring were maintained for 3 days or 21 days, at which point their ovaries  
432 were examined using a squash prep (Srivastav & Kelleher, 2017). 21 day- old females were

433 transferred onto new food every 5 days as they aged to avoid bacterial growth. Females who  
434 produced 1 or more chorionated egg chambers were scored as having non-atrophied ovaries,  
435 and females producing 0 egg chambers were scored as having atrophied ovaries.

436 Crosses and phenotyping were performed for 673 RILs across 22 experimental blocks  
437 for 3 day-old F1 females, and 552 RILs across 18 experimental blocks for 21 day-old F1  
438 females. If fewer than 21 F1 offspring were phenotyped for the same cross, it was discarded  
439 and repeated if possible. In total, we phenotyped >20 3-day old and 21 day-old F1 female  
440 offspring for 595 RILs and 456 RILs, respectively.

441  
442 **QTL mapping.** QTL mapping was performed as described in Kelleher *et al.* (2018). Briefly, for  
443 each developmental time point, we modeled the arcsine transformed proportion of F1 ovarian  
444 atrophy as a function of two random effects: experimental block and undergraduate  
445 experimenter. Regression models were fit using the lmer function from the lme4 package (Bates  
446 *et al.*, 2015). We then used the residuals as a response for QTL mapping using the DSPRqtl  
447 package (King *et al.*, 2012) in R 3.02 (Team & TRDC, 2008). The LOD significance threshold  
448 was determined from 1,000 permutations of the observed data, and the confidence interval  
449 around each LOD peak was identified by a difference of -2 from the LOD peak position ( $\Delta 2$ -  
450 LOD), or from the Bayes Confidence Interval (Manichaikul *et al.*, 2006). For  $\Delta 2$ -LOD intervals,  
451 we took the conservative approach of determining the longest contiguous interval where the  
452 LOD score was within 2 of the peak value. We further calculated the broad sense heritability of  
453 ovarian atrophy as in Kelleher *et al.* (2018).

454  
455 **Estimation of Founder Phenotypes and QTL phasing.** To estimate the phenotypic effect  
456 associated with each founder allele at the QTL peak, we considered the distribution of  
457 phenotypes from all RILs carrying the founder haplotype at the LOD peak position (genotype  
458 probability >0.95%) (King *et al.*, 2012). QTL were then phased into allelic classes by identifying  
459 the minimal number of partitions of founder haplotypes that describes phenotypic variation  
460 associated with the QTL peak, as described previously (Kelleher *et al.*, 2018; King *et al.*, 2012).

461  
462 **Identification of in-phase polymorphisms.** The SNP data of B founders that used to infer in-  
463 phase SNPs is based on dm3 (King *et al.*, 2012). To identify in-phase SNPs we looked for  
464 alternate SNP alleles that match the predicted phenotypic class for each of the QTL peaks. For  
465 QTL-21d we used the criteria: sensitive class (B2, B6) and the tolerant class (B1, B3, B4, B7,  
466 B8), whereas for QTL-3d: sensitive class (B6) and the tolerant class (B1, B2, B3, B4, B7, B8).

467  
468 **Selection of paired RILs with alternate QTL alleles.** We identified background matched RILs  
469 containing either the B6 (“sensitive”) or B4 (“tolerant”) haplotypes from the start position of the  
470 QTL-21d confidence interval (2L: 19,010,000) to the end position of QTL-3d confidence interval  
471 (2R: 6,942,495) ( $P > 0.9$ ), based on their published HMM genotypes (King *et al.*, 2012). For all  
472 possible RIL pairs (B6 and B4), we then calculated the number of 10 Kb genomic windows in  
473 which they carried the same RIL haplotype ( $P < 0.9$ ). We selected three pairs of RILs, which  
474 carry the same founder genotype for 47% (21213 & 21183), 46% (21147 & 21346) and 44%  
475 (21291 & 21188) of genomic windows outside of the QTL.

476



477 **Small RNA-seq and total RNA-seq.** RILs were maintained at 25°C, and three biological  
478 replicates of 20 ovaries were dissected from 3-5 day old females. Ovaries were homogenized  
479 in TRIzol and stored at -80°C until RNA extraction. 50 µg of total RNA from each of 18 biological  
480 samples (3 biological replicates x 3 pairs) was size fractionated in a 15% denaturing  
481 polyacrylamide gel and the 18-30 nt band was excised. 2S-depleted small RNA libraries for  
482 Illumina sequencing were then constructed according to the method of Wickersheim and  
483 Blumenstiel (2013). Ovarian small RNA libraries were published previously (SRP160954, Zhang  
484 & Kelleher, 2019). Ribodepleted and stranded total RNA libraries were generated from the same  
485 ovarian samples using NuGen total RNA kit (TECAN). All 18 small RNA and total RNA libraries  
486 were sequenced on an Illumina Nextseq 500 at the University of Houston Seq-N-Edit Core.

487  
488 **Small-RNA analysis.** Sequenced small RNAs were separated based on size into  
489 miRNAs/siRNAs (18-22nt) and piRNAs (23-30nt) (Brennecke et al., 2008). Reads  
490 corresponding to contaminating rRNAs, including 2S-rRNA, were removed from each library by  
491 aligning to annotated transcripts from flybase (Gramates et al., 2017). To determine the piRNA  
492 cluster activity we first uniquely aligned the piRNAs to reference genome (dm6) using Bowtie2 (-  
493 v 1 -m 1) (Langmead & Salzberg, 2012). We then used a customized perl script to count reads  
494 that mapped to a set of previously annotated piRNA clusters from the same genotypes (497  
495 piRNA clusters, Zhang et al., 2020) Read counts normalized to total mapped microRNAs for  
496 each library were used to infer differential expression using DESeq2 (Love et al., 2014) Sliding  
497 window estimates of piRNA abundance (Figure 2C,D) were calculated using bedtools  
498 genomecov (Quinlan, 2014), normalizing the read counts to total mapped miRNA reads.

499  
500 **Total RNA analysis.** Residual ribosomal RNAs (rRNAs) were identified in ribodepleted libraries  
501 based on alignment to annotated rRNAs from flybase (Gramates et al., 2017), and excluded  
502 from further analysis. Retained reads aligned to the library of consensus satellite and TE  
503 sequences from repbase (Bao et al., 2015), plus additional satellite consensus sequences from  
504 Larracuente (2014). For TE expression, the total reads mapped to TE sequences were counted  
505 using awk commands. Remaining reads that failed to map were aligned to *D. melanogaster*  
506 transcriptome (dm6/BDGP6) using Kallisto with default parameters (Bray et al., 2016).  
507 Differentially expressed TEs and genes were identified from a combined analysis in DESeq2  
508 (Love et al., 2014). Genes and TEs with base mean  $\geq 100$ , Adjusted *P*-value  $\leq 0.05$  and  
509 whose expression pattern differed (fold change  $\geq 1.5$ ) were considered differentially expressed  
510 between the B6 and B4 QTL haplotype.

## 511 References

- 512 Alexander, J. L., Barrasa, M. I., & Orr-Weaver, T. L. (2015). Replication Fork  
513 Progression during Re-replication Requires the DNA Damage Checkpoint and  
514 Double-Strand Break Repair. *Current Biology: CB*, 25(12), 1654–1660.

- 515 Ambrosio, L., & Schedl, P. (1985). Two discrete modes of histone gene expression  
516 during oogenesis in *Drosophila melanogaster*. *Developmental Biology*, 111(1),  
517 220–231.
- 518 Anxolabéhère, D., Kidwell, M. G., & Periquet, G. (1988). Molecular characteristics of  
519 diverse populations are consistent with the hypothesis of a recent invasion of  
520 *Drosophila melanogaster* by mobile P elements. *Molecular Biology and Evolution*,  
521 5(3), 252–269.
- 522 Bao, W., Kojima, K. K., & Kohany, O. (2015). Repbase Update, a database of repetitive  
523 elements in eukaryotic genomes. *Mobile DNA*, 6, 11.
- 524 Bates, D., Mächler, M., Bolker, B., & Walker, S. (2015). Fitting Linear Mixed-Effects  
525 Models Using lme4. *Journal of Statistical Software*, 67(1), 1–48.
- 526 Bergman, C. M., & Bensasson, D. (2007). Recent LTR retrotransposon insertion  
527 contrasts with waves of non-LTR insertion since speciation in *Drosophila*  
528 *melanogaster*. *Proceedings of the National Academy of Sciences of the United*  
529 *States of America*, 104(27), 11340–11345.
- 530 Bray, N. L., Pimentel, H., Melsted, P., & Pachter, L. (2016). Near-optimal probabilistic  
531 RNA-seq quantification. *Nature Biotechnology*, 34(5), 525–527.
- 532 Brennecke, J., Aravin, A. A., Stark, A., Dus, M., Kellis, M., Sachidanandam, R., &  
533 Hannon, G. J. (2007). Discrete small RNA-generating loci as master regulators of  
534 transposon activity in *Drosophila*. *Cell*, 128(6), 1089–1103.
- 535 Brennecke, J., Malone, C. D., Aravin, A. A., Sachidanandam, R., Stark, A., & Hannon,  
536 G. J. (2008). An epigenetic role for maternally inherited piRNAs in transposon  
537 silencing. *Science*, 322(5906), 1387–1392.

- 538 Bridges, C. B. (1935). SALIVARY CHROMOSOME MAPS: With a Key to the Banding of  
539 the Chromosomes of *Drosophila Melanogaster*. *The Journal of Heredity*, 26(2), 60–  
540 64.
- 541 Bridges, P. N. (1942). A NEW MAP OF THE SALIVARY GLAND 2L-CHROMOSOME:  
542 of *Drosophila Melanogaster*. *Journal of Heredity*, 33(11), 403–408.
- 543 Chuong, E. B., Elde, N. C., & Feschotte, C. (2017). Regulatory activities of transposable  
544 elements: from conflicts to benefits. *Nature Reviews. Genetics*, 18(2), 71–86.
- 545 Claycomb, J. M., Benasutti, M., Bosco, G., Fenger, D. D., & Orr-Weaver, T. L. (2004).  
546 Gene Amplification as a Developmental Strategy: Isolation of Two Developmental  
547 Amplicons in *Drosophila*. *Developmental Cell*, 6(1), 145–155.
- 548 Dorogova, N. V., Bolobolova, E. U., & Zakharenko, L. P. (2017). Cellular aspects of  
549 gonadal atrophy in *Drosophila* P-M hybrid dysgenesis. *Developmental Biology*,  
550 424(2), 105–112.
- 551 Gallant, P. (2013). Myc function in *Drosophila*. *Cold Spring Harbor Perspectives in*  
552 *Medicine*, 3(10), a014324.
- 553 Gramates, L. S., Marygold, S. J., Santos, G. dos, Urbano, J.-M., Antonazzo, G.,  
554 Matthews, B. B., Rey, A. J., Tabone, C. J., Crosby, M. A., Emmert, D. B., Falls, K.,  
555 Goodman, J. L., Hu, Y., Ponting, L., Schroeder, A. J., Strelets, V. B., Thurmond, J.,  
556 & Zhou, P. (2017). FlyBase at 25: looking to the future. *Nucleic Acids Research*,  
557 45(D1), D663–D671.
- 558 Grifoni, D., & Bellosta, P. (2015). *Drosophila* Myc: A master regulator of cellular  
559 performance. *Biochimica et Biophysica Acta*, 1849(5), 570–581.
- 560 Gunjan, A., & Verreault, A. (2003). A Rad53 kinase-dependent surveillance mechanism

561 that regulates histone protein levels in *S. cerevisiae*. *Cell*, 115(5).  
562 [https://doi.org/10.1016/s0092-8674\(03\)00896-1](https://doi.org/10.1016/s0092-8674(03)00896-1)

563 Hanai, K., Furuhashi, H., Yamamoto, T., Akasaka, K., & Hirose, S. (2008). RSF  
564 Governs Silent Chromatin Formation via Histone H2Av Replacement. *PLoS*  
565 *Genetics*, 4(2). <https://doi.org/10.1371/journal.pgen.1000011>

566 Harris, R. E., Pargett, M., Sutcliffe, C., Umulis, D., & Ashe, H. L. (2011). Brat Promotes  
567 Stem Cell Differentiation via Control of a Bistable Switch that Restricts BMP  
568 Signaling. In *Developmental Cell* (Vol. 20, Issue 1, pp. 72–83).  
569 <https://doi.org/10.1016/j.devcel.2010.11.019>

570 Hoskins, R. A., Carlson, J. W., Wan, K. H., Park, S., Mendez, I., Galle, S. E., Booth, B.  
571 W., Pfeiffer, B. D., George, R. A., Svirskas, R., Krzywinski, M., Schein, J., Accardo,  
572 M. C., Damia, E., Messina, G., Méndez-Lago, M., de Pablos, B., Demakova, O. V.,  
573 Andreyeva, E. N., ... Celniker, S. E. (2015). The Release 6 reference sequence of  
574 the *Drosophila melanogaster* genome. *Genome Research*, 25(3), 445.

575 Ignatenko, O. M., Zakharenko, L. P., Dorogova, N. V., & Fedorova, S. A. (2015). P  
576 elements and the determinants of hybrid dysgenesis have different dynamics of  
577 propagation in *Drosophila melanogaster* populations. *Genetica*, 143(6), 751–759.

578 Kaminker, J. S., Bergman, C. M., Kronmiller, B., Carlson, J., Svirskas, R., Patel, S.,  
579 Frise, E., Wheeler, D. A., Lewis, S. E., Rubin, G. M., Ashburner, M., & Celniker, S.  
580 E. (2002). The transposable elements of the *Drosophila melanogaster* euchromatin:  
581 a genomics perspective. *Genome Biology*, 3(12), 1–20.

582 Karpen, G. H., & Spradling, A. C. (1992). Analysis of Subtelomeric Heterochromatin in  
583 the *Drosophila* Minichromosome Dp1187 by Single P Element Insertional

- 584 Mutagenesis. *Genetics*, 132(3), 737.
- 585 Kelleher, E. S. (2016). Reexamining the P-Element Invasion of *Drosophila*  
586 *melanogaster* Through the Lens of piRNA Silencing. *Genetics*, 203(4), 1513–1531.
- 587 Kelleher, E. S., Jaweria, J., Akoma, U., Ortega, L., & Tang, W. (2018). QTL mapping of  
588 natural variation reveals that the developmental regulator *bruno* reduces tolerance  
589 to P-element transposition in the *Drosophila* female germline. *PLoS Biology*,  
590 16(10), e2006040.
- 591 Kidwell, M.G., Frydryck, T., and Novy, J.B. (1983). The hybrid dysgenesis potential of  
592 *Drosophila melanogaster* strains of diverse temporal and geographical natural  
593 origins. *Drosophila Information Service*, 59, 59–63.
- 594 Kidwell, M. G., Kidwell, J. F., & Sved, J. A. (1977). Hybrid Dysgenesis in *DROSOPHILA*  
595 *MELANOGASTER*: A Syndrome of Aberrant Traits Including Mutation, Sterility and  
596 Male Recombination. *Genetics*, 86(4), 813–833.
- 597 Kim, J. C., Nordman, J., Xie, F., Kashevsky, H., Eng, T., Li, S., MacAlpine, D. M., & Orr-  
598 Weaver, T. L. (2011). Integrative analysis of gene amplification in *Drosophila* follicle  
599 cells: parameters of origin activation and repression. *Genes & Development*,  
600 25(13), 1384.
- 601 King, E. G., Merkes, C. M., McNeil, C. L., Hofer, S. R., Sen, S., Broman, K. W., Long,  
602 A. D., & Macdonald, S. J. (2012). Genetic dissection of a model complex trait using  
603 the *Drosophila* Synthetic Population Resource. *Genome Research*, 22(8), 1558–  
604 1566.
- 605 Kohany, O., Gentles, A. J., Hankus, L., & Jurka, J. (2006). Annotation, submission and  
606 screening of repetitive elements in Repbase: RepbaseSubmitter and Censor. *BMC*

- 607        *Bioinformatics*, 7(1), 1–7.
- 608    Kumar, K., Moirangthem, R., & Kaur, R. (2020). Histone H4 dosage modulates DNA  
609        damage response in the pathogenic yeast *Candida glabrata* via homologous  
610        recombination pathway. *PLoS Genetics*, 16(3), e1008620.
- 611    Kusch, T., Florens, L., Macdonald, W. H., Swanson, S. K., Glaser, R. L., Yates, J. R.,  
612        Abmayr, S. M., Washburn, M. P., & Workman, J. L. (2004). Acetylation by Tip60 is  
613        required for selective histone variant exchange at DNA lesions. *Science* ,  
614        306(5704). <https://doi.org/10.1126/science.1103455>
- 615    Landais, S., D’Alterio, C., & Jones, D. L. (2014). Persistent replicative stress alters  
616        polycomb phenotypes and tissue homeostasis in *Drosophila melanogaster*. *Cell*  
617        *Reports*, 7(3). <https://doi.org/10.1016/j.celrep.2014.03.042>
- 618    Lander, E. S., & Botstein, D. (1989). Mapping mendelian factors underlying quantitative  
619        traits using RFLP linkage maps. *Genetics*, 121(1), 185–199.
- 620    Langmead, B., & Salzberg, S. L. (2012). Fast gapped-read alignment with Bowtie 2.  
621        *Nature Methods*, 9(4), 357–359.
- 622    Larracuenta, A. M. (2014). The organization and evolution of the Responder satellite in  
623        species of the *Drosophila melanogaster* group: dynamic evolution of a target of  
624        meiotic drive. *BMC Evolutionary Biology*, 14(1), 233.
- 625    Liang, D., Burkhart, S. L., Singh, R. K., Kabbaj, M.-H. M., & Gunjan, A. (2012). Histone  
626        dosage regulates DNA damage sensitivity in a checkpoint-independent manner by  
627        the homologous recombination pathway. *Nucleic Acids Research*, 40(19), 9604.
- 628    Long, A. D., Macdonald, S. J., & King, E. G. (2014). Dissecting Complex Traits Using  
629        the *Drosophila* Synthetic Population Resource. *Trends in Genetics: TIG*, 30(11),

- 630 488.
- 631 Love, M. I., Huber, W., & Anders, S. (2014). Moderated estimation of fold change and  
632 dispersion for RNA-seq data with DESeq2. *Genome Biology*, 15(12), 550.
- 633 Malone, C. D., & Hannon, G. J. (2009). Small RNAs as guardians of the genome. *Cell*,  
634 136(4), 656–668.
- 635 Manichaikul, A., Dupuis, J., Sen, S., & Broman, K. W. (2006). Poor performance of  
636 bootstrap confidence intervals for the location of a quantitative trait locus. *Genetics*,  
637 174(1), 481–489.
- 638 Mauricio, R. (2000). Natural selection and the joint evolution of tolerance and resistance  
639 as plant defenses. In *Evolutionary Ecology* (Vol. 14, Issues 4-6, pp. 491–507).  
640 <https://doi.org/10.1023/a:1010909829269>
- 641 Ma, X., Han, Y., Song, X., Do, T., Yang, Z., Ni, J., & Xie, T. (2016). DNA damage-  
642 induced Lok/CHK2 activation compromises germline stem cell self-renewal and  
643 lineage differentiation. *Development*, 143(23), 4312–4323.
- 644 Ma, X., Zhu, X., Han, Y., Story, B., Do, T., Song, X., Wang, S., Zhang, Y., Blanchette,  
645 M., Gogol, M., Hall, K., Peak, A., Anoja, P., & Xie, T. (2017). Aubergine Controls  
646 Germline Stem Cell Self-Renewal and Progeny Differentiation via Distinct  
647 Mechanisms. *Developmental Cell*, 41(2), 157–169.e5.
- 648 McCarthy, A., Deiulio, A., Martin, E. T., Upadhyay, M., & Rangan, P. (2018). Tip60  
649 complex promotes expression of a differentiation factor to regulate germline  
650 differentiation in female *Drosophila*. *Molecular Biology of the Cell*, 29(24), 2933.
- 651 McKay, D. J., Klusza, S., Penke, T. J. R., Meers, M. P., Curry, K. P., McDaniel, S. L.,  
652 Malek, P. Y., Cooper, S. W., Tatomer, D. C., Lieb, J. D., Strahl, B. D., Duronio, R.

- 653 J., & Matera, A. G. (2015). Interrogating the function of metazoan histones using  
654 engineered gene clusters. *Developmental Cell*, 32(3), 373–386.
- 655 Messina, G., Damia, E., Fanti, L., Atterato, M. T., Celauro, E., Mariotti, F. R., Accardo,  
656 M. C., Walther, M., Verni, F., Picchioni, D., Moschetti, R., Caizzi, R., Piacentini, L.,  
657 Cenci, G., Giordano, E., & Dimitri, P. (2014). Yeti, an essential *Drosophila*  
658 melanogaster gene, encodes a protein required for chromatin organization. *Journal*  
659 *of Cell Science*, 127(11), 2577–2588.
- 660 Montero, L., Müller, N., & Gallant, P. (2008). Induction of apoptosis by *Drosophila* Myc.  
661 *Genesis*, 46(2), 104–111.
- 662 Moon, S., Cassani, M., Lin, Y. A., Wang, L., Dou, K., & Zhang, Z. Z. (2018). A Robust  
663 Transposon-Endogenizing Response from Germline Stem Cells. *Developmental*  
664 *Cell*, 47(5), 660–671.e3.
- 665 Murga, M., Jaco, I., Fan, Y., Soria, R., Martinez-Pastor, B., Cuadrado, M., Yang, S.-M.,  
666 Blasco, M. A., Skoultchi, A. I., & Fernandez-Capetillo, O. (2007). Global chromatin  
667 compaction limits the strength of the DNA damage response. *The Journal of Cell*  
668 *Biology*, 178(7), 1101.
- 669 Ner, S. S., Harrington, M. J., & Grigliatti, T. A. (2002). A Role for the *Drosophila*  
670 SU(VAR)3-9 Protein in Chromatin Organization at the Histone Gene Cluster and in  
671 Suppression of Position-Effect Variegation. *Genetics*, 162(4), 1763–1774.
- 672 Nishida, K. M., Saito, K., Mori, T., Kawamura, Y., Nagami-Okada, T., Inagaki, S., Siomi,  
673 H., & Siomi, M. C. (2007). Gene silencing mechanisms mediated by Aubergine  
674 piRNA complexes in *Drosophila* male gonad. *RNA*, 13(11), 1911–1922.
- 675 Orian, A., van Steensel, B., Delrow, J., Bussemaker, H. J., Li, L., Sawado, T., Williams,



676 E., Loo, L. W. M., Cowley, S. M., Yost, C., Pierce, S., Edgar, B. A., Parkhurst, S.  
677 M., & Eisenman, R. N. (2003). Genomic binding by the Drosophila Myc, Max,  
678 Mad/Mnt transcription factor network. *Genes & Development*, 17(9), 1101–1114.

679 Ota, R., & Kobayashi, S. (2020). Myc plays an important role in Drosophila P-M hybrid  
680 dysgenesis to eliminate germline cells with genetic damage. *Communications*  
681 *Biology*, 3(1), 185.

682 Ozawa, N., Furuhashi, H., Masuko, K., Numao, E., Makino, T., Yano, T., & Kurata, S.  
683 (2016). Organ identity specification factor WGE localizes to the histone locus body  
684 and regulates histone expression to ensure genomic stability in Drosophila. *Genes*  
685 *to Cells: Devoted to Molecular & Cellular Mechanisms*, 21(5).  
686 <https://doi.org/10.1111/gtc.12354>

687 Parisi, M. J., Deng, W., Wang, Z., & Lin, H. (2001). The arrest gene is required for  
688 germline cyst formation during Drosophila oogenesis. *Genesis*, 29(4), 196–209.

689 Post, C., Clark, J. P., Sytnikova, Y. A., Chirn, G.-W., & Lau, N. C. (2014). The capacity  
690 of target silencing by Drosophila PIWI and piRNAs. In *RNA* (Vol. 20, Issue 12, pp.  
691 1977–1986). <https://doi.org/10.1261/rna.046300.114>

692 Potter-Birriel, J., Gonsalvez, G. B., & Marzluff, W. F. (2020). A region of Drosophila  
693 SLBP distinct from the histone pre-mRNA binding and processing domains is  
694 essential for deposition of histone mRNA in the oocyte. In *Cold Spring Harbor*  
695 *Laboratory* (p. 2020.04.16.030577). <https://doi.org/10.1101/2020.04.16.030577>

696 Prado, J. R. M., Srinivasan, S., & Fuller, M. T. (2013). The Histone Variant His2Av is  
697 Required for Adult Stem Cell Maintenance in the Drosophila Testis. *PLoS Genetics*,  
698 9(11), e1003903.

- 699 Qi, D., Jin, H., Lilja, T., & Mannervik, M. (2006). Drosophila Reptin and Other TIP60  
700 Complex Components Promote Generation of Silent Chromatin. *Genetics*, 174(1),  
701 241.
- 702 Quesneville, H., Bergman, C. M., Andrieu, O., Autard, D., Nouaud, D., Ashburner, M., &  
703 Anxolabehere, D. (2005). Combined evidence annotation of transposable elements  
704 in genome sequences. *PLoS Computational Biology*, 1(2), 166–175.
- 705 Quinlan, A. R. (2014). BEDTools: The Swiss-Army Tool for Genome Feature Analysis.  
706 *Current Protocols in Bioinformatics / Editorial Board, Andreas D. Baxevanis ... [et*  
707 *Al.]*, 47, 11.12.1–34.
- 708 Råberg, L. (2014). How to live with the enemy: understanding tolerance to parasites.  
709 *PLoS Biology*, 12(11), e1001989.
- 710 Riddle, N. C., Minoda, A., Kharchenko, P. V., Alekseyenko, A. A., Schwartz, Y. B.,  
711 Tolstorukov, M. Y., Gorchakov, A. A., Jaffe, J. D., Kennedy, C., Linder-Basso, D.,  
712 Peach, S. E., Shanower, G., Zheng, H., Kuroda, M. I., Pirrotta, V., Park, P. J., Elgin,  
713 S. C. R., & Karpen, G. H. (2011). Plasticity in patterns of histone modifications and  
714 chromosomal proteins in Drosophila heterochromatin. *Genome Research*, 21(2),  
715 147.
- 716 Rojas-Ríos, P., Chartier, A., Pierson, S., & Simonelig, M. (2017). Aubergine and piRNAs  
717 promote germline stem cell self-renewal by repressing the proto-oncogene. *The*  
718 *EMBO Journal*, 36(21), 3194–3211.
- 719 Roy, B. A., & Kirchner, J. W. (2000). Evolutionary dynamics of pathogen resistance and  
720 tolerance. *Evolution; International Journal of Organic Evolution*, 54(1), 51–63.
- 721 Ruddell, A., & Jacobs-Lorena, M. (1985). Biphasic pattern of histone gene expression

- 722 during *Drosophila* oogenesis. *Proceedings of the National Academy of Sciences of*  
723 *the United States of America*, 82(10), 3316–3319.
- 724 Ruhf, M. L., Braun, A., Papoulas, O., Tamkun, J. W., Randsholt, N., & Meister, M.  
725 (2001). The domino gene of *Drosophila* encodes novel members of the SWI2/SNF2  
726 family of DNA-dependent ATPases, which contribute to the silencing of homeotic  
727 genes. *Development*, 128(8), 1429–1441.
- 728 Rust, K., Tiwari, M. D., Mishra, V. K., Grawe, F., & Wodarz, A. (2018). Myc and the  
729 Tip60 chromatin remodeling complex control neuroblast maintenance and polarity  
730 in *Drosophila*. *The EMBO Journal*, 37(16).  
731 <https://doi.org/10.15252/emj.201798659>
- 732 Schaefer, R. E., Kidwell, M. G., & Fausto-Sterling, A. (1979). Hybrid Dysgenesis in  
733 *DROSOPHILA MELANOGASTER*: Morphological and Cytological Studies of  
734 Ovarian Dysgenesis. *Genetics*, 92(4), 1141–1152.
- 735 Sinclair, D. A., Clegg, N. J., Antonchuk, J., Milne, T. A., Stankunas, K., Ruse, C.,  
736 Grigliatti, T. A., Kassis, J. A., & Brock, H. W. (1998). Enhancer of Polycomb is a  
737 suppressor of position-effect variegation in *Drosophila melanogaster*. *Genetics*,  
738 148(1), 211–220.
- 739 Spradling, A. C. (1981). The organization and amplification of two chromosomal  
740 domains containing *drosophila* chorion genes. *Cell*, 27(1), 193–201.
- 741 Srivastav, S. P., & Kelleher, E. S. (2017). Paternal Induction of Hybrid Dysgenesis in  
742 *Drosophila melanogaster* Is Weakly Correlated with Both *P*-Element and *hobo*  
743 Element Dosage. *G3: Genes/Genomes/Genetics*, g3.117.040634.
- 744 Sun, Y., Jiang, X., Xu, Y., Ayrapetov, M. K., Moreau, L. A., Whetstine, J. R., & Price, B.

- 745 D. (2009). Histone H3 methylation links DNA damage detection to activation of the  
746 tumour suppressor Tip60. *Nature Cell Biology*, 11(11), 1376–1382.
- 747 Tasnim, S., & Kelleher, E. S. (2018). p53 is required for female germline stem cell  
748 maintenance in P-element hybrid dysgenesis. *Developmental Biology*, 434(2), 215–  
749 220.
- 750 Tauc, H. M., Tasdogan, A., Meyer, P., & Pandur, P. (2017). Nipped-A regulates  
751 intestinal stem cell proliferation in *Drosophila*. *Development*, 144(4), 612–623.
- 752 Team, & TRDC. (2008). The R Project for Statistical Computing. [Http://www.r-](http://www.r-)  
753 [Project.org](http://www.R-project.org). <https://ci.nii.ac.jp/naid/10027310073>
- 754 Teixeira, F. K., Okuniewska, M., Malone, C. D., Coux, R.-X., Rio, D. C., & Lehmann, R.  
755 (2017). piRNA-mediated regulation of transposon alternative splicing in the soma  
756 and germ line. *Nature*, 552(7684), 268–272.
- 757 Tootle, T. L., Williams, D., Hubb, A., Frederick, R., & Spradling, A. (2011). *Drosophila*  
758 Eggshell Production: Identification of New Genes and Coordination by Pxt. *PLoS*  
759 *One*, 6(5), e19943.
- 760 Walter, M. F., Jang, C., Kasravi, B., Donath, J., Mechler, B. M., Mason, J. M., &  
761 Biessmann, H. (1995). DNA organization and polymorphism of a wild-type  
762 *Drosophila* telomere region. *Chromosoma*, 104(4), 229–241.
- 763 Wang, Z., & Lin, H. (2007). Sex-lethal is a target of Bruno-mediated translational  
764 repression in promoting the differentiation of stem cell progeny during *Drosophila*  
765 oogenesis. *Developmental Biology*, 302(1), 160–168.
- 766 Waring, G. L. (2000). Morphogenesis of the eggshell in *Drosophila*. *International Review*  
767 *of Cytology*, 198. [https://doi.org/10.1016/s0074-7696\(00\)98003-3](https://doi.org/10.1016/s0074-7696(00)98003-3)

- 768 Waring, G. L. (2000). Morphogenesis of the eggshells in *Drosophila*. In *International*  
769 *Review of Cytology* (Vol. 198, pp. 67–108). Academic Press.
- 770 Wickersheim, M. L., & Blumenstiel, J. P. (2013). Terminator oligo blocking efficiently  
771 eliminates rRNA from *Drosophila* small RNA sequencing libraries. *BioTechniques*,  
772 *55*(5), 269–272.
- 773 Xin, T., Xuan, T., Tan, J., Li, M., Zhao, G., & Li, M. (2013). The *Drosophila* putative  
774 histone acetyltransferase Enok maintains female germline stem cells through  
775 regulating Bruno and the niche. *Developmental Biology*, *384*(1), 1–12.
- 776 Yan, D., Neumüller, R. A., Buckner, M., Ayers, K., Li, H., Hu, Y., Yang-Zhou, D., Pan,  
777 L., Wang, X., Kelley, C., Vinayagam, A., Binari, R., Randklev, S., Perkins, L. A.,  
778 Xie, T., Cooley, L., & Perrimon, N. (2014). A regulatory network of *Drosophila*  
779 germline stem cell self-renewal. *Developmental Cell*, *28*(4), 459–473.
- 780 Yin, H., & Lin, H. (2007). An epigenetic activation role of Piwi and a Piwi-associated  
781 piRNA in *Drosophila melanogaster*. *Nature*, *450*(7167), 304–308.
- 782 Zhang, S., & Kelleher, E. S. (2019). piRNA-mediated silencing of an invading  
783 transposable element evolves rapidly through abundant beneficial de novo  
784 mutations. In *bioRxiv* (p. 611350). <https://doi.org/10.1101/611350>
- 785 Zhang, S., Pointer, B., & Kelleher, E. S. (2020). Rapid evolution of piRNA-mediated  
786 silencing of an invading transposable element was driven by abundant de novo  
787 mutations. *Genome Research*, *30*(4), 566–575.
- 788
